# Supplementary material
Source: publisher figshare collection journal article supplement (https://acs.figshare.com/ndownloader/files/4459405)
Supplement: Supplementary file 1 [file 4459405]

 
data_shelxs 
 
_audit_creation_method            SHELXL-97 
_chemical_name_systematic 
; 
 ? 
; 
_chemical_name_common             ? 
_chemical_melting_point           ? 
_chemical_formula_moiety          'C32 H30 O8' 
_chemical_formula_sum 
 'C32 H30 O8' 
_chemical_formula_weight          542.56 
 
loop_ 
 _atom_type_symbol 
 _atom_type_description 
 _atom_type_scat_dispersion_real 
 _atom_type_scat_dispersion_imag 
 _atom_type_scat_source 
 'C'  'C'   0.0033   0.0016 
 'International Tables Vol C Tables 4.2.6.8 and 6.1.1.4' 
 'H'  'H'   0.0000   0.0000 
 'International Tables Vol C Tables 4.2.6.8 and 6.1.1.4' 
 'O'  'O'   0.0106   0.0060 
 'International Tables Vol C Tables 4.2.6.8 and 6.1.1.4' 
 
_symmetry_cell_setting            'orthorhombic' 
_symmetry_space_group_name_H-M    'P212121'
_symmetry_space_group_name_Hall   'P 2ac 2ab'

 
loop_ 
 _symmetry_equiv_pos_as_xyz 
 'x, y, z' 
 '-x+1/2, -y, z+1/2' 
 '-x, y+1/2, -z+1/2' 
 'x+1/2, -y+1/2, -z' 
 
_cell_length_a                    9.2753(19) 
_cell_length_b                    15.671(3) 
_cell_length_c                    17.772(4) 
_cell_angle_alpha                 90.00 
_cell_angle_beta                  90.00 
_cell_angle_gamma                 90.00 
_cell_volume                      2583.2(9) 
_cell_formula_units_Z             4 
_cell_measurement_temperature     110(2) 
_cell_measurement_reflns_used     6395
_cell_measurement_theta_min       2.1493
_cell_measurement_theta_max       31.0181
 
_exptl_crystal_description        'block' 
_exptl_crystal_colour             'colorless'
_exptl_crystal_size_max           0.26 
_exptl_crystal_size_mid           0.26 
_exptl_crystal_size_min           0.22 
_exptl_crystal_density_meas       ? 
_exptl_crystal_density_diffrn     1.395 
_exptl_crystal_density_method     'not measured' 
_exptl_crystal_F_000              1144 
_exptl_absorpt_coefficient_mu     0.100 
_exptl_absorpt_correction_type    'multi-scan' 
_exptl_absorpt_correction_T_min   0.9740 
_exptl_absorpt_correction_T_max   0.9783 
_exptl_absorpt_process_details    'R. H. Blessing, Acta Cryst. 1995 A51, 33-38'
 
_exptl_special_details 
; 
 ? 
; 
 
_diffrn_ambient_temperature       110(2) 
_diffrn_radiation_wavelength      0.71073 
_diffrn_radiation_type            MoK\a 
_diffrn_radiation_source          'fine-focus sealed tube' 
_diffrn_radiation_monochromator   graphite 
_diffrn_measurement_device_type   'Rigaku Saturn 70 CCD area detector' 
_diffrn_measurement_method        '\w scans' 
_diffrn_detector_area_resol_mean  ? 
_diffrn_standards_number          ? 
_diffrn_standards_interval_count  ? 
_diffrn_standards_interval_time   ? 
_diffrn_standards_decay_%         ? 
_diffrn_reflns_number             11412 
_diffrn_reflns_av_R_equivalents   0.0238 
_diffrn_reflns_av_sigmaI/netI     0.0401 
_diffrn_reflns_limit_h_min        -12 
_diffrn_reflns_limit_h_max        7 
_diffrn_reflns_limit_k_min        -16 
_diffrn_reflns_limit_k_max        20 
_diffrn_reflns_limit_l_min        -18 
_diffrn_reflns_limit_l_max        23 
_diffrn_reflns_theta_min          1.73 
_diffrn_reflns_theta_max          28.28 
_reflns_number_total              6319 
_reflns_number_gt                 5934 
_reflns_threshold_expression      >2sigma(I) 
 
_computing_data_collection        'CrystalClear (Rigaku Inc., 2008)'
_computing_cell_refinement        'CrystalClear (Rigaku Inc., 2008)'
_computing_data_reduction         'CrystalClear (Rigaku Inc., 2008)'

_computing_structure_solution     'SHELXS-97 (Sheldrick, 1990)' 
_computing_structure_refinement   'SHELXL-97 (Sheldrick, 1997)' 
_computing_molecular_graphics     ? 
_computing_publication_material   ? 
 
_refine_special_details 
; 
 Refinement of F^2^ against ALL reflections.  The weighted R-factor wR and 
 goodness of fit S are based on F^2^, conventional R-factors R are based 
 on F, with F set to zero for negative F^2^. The threshold expression of 
 F^2^ > 2sigma(F^2^) is used only for calculating R-factors(gt) etc. and is 
 not relevant to the choice of reflections for refinement.  R-factors based 
 on F^2^ are statistically about twice as large as those based on F, and R- 
 factors based on ALL data will be even larger. 
; 
 
_refine_ls_structure_factor_coef  Fsqd  
_refine_ls_matrix_type            full 
_refine_ls_weighting_scheme       calc  
_refine_ls_weighting_details 
 'calc w=1/[\s^2^(Fo^2^)+(0.0632P)^2^+0.4197P] where P=(Fo^2^+2Fc^2^)/3' 
_atom_sites_solution_primary      direct 
_atom_sites_solution_secondary    difmap 
_atom_sites_solution_hydrogens    geom
_chemical_absolute_configuration  rm 
_refine_ls_hydrogen_treatment     constr 
_refine_ls_extinction_method      none 
_refine_ls_extinction_coef        ? 
_refine_ls_abs_structure_details 
 'Flack H D (1983), Acta Cryst. A39, 876-881' 
_refine_ls_abs_structure_Flack    0.9(8) 
_refine_ls_number_reflns          6319 
_refine_ls_number_parameters      367 
_refine_ls_number_restraints      0 
_refine_ls_R_factor_all           0.0527 
_refine_ls_R_factor_gt            0.0490 
_refine_ls_wR_factor_ref          0.1273 
_refine_ls_wR_factor_gt           0.1226 
_refine_ls_goodness_of_fit_ref    1.092 
_refine_ls_restrained_S_all       1.092 
_refine_ls_shift/su_max           0.004 
_refine_ls_shift/su_mean          0.000 
 
loop_ 
 _atom_site_label 
 _atom_site_type_symbol 
 _atom_site_fract_x 
 _atom_site_fract_y 
 _atom_site_fract_z 
 _atom_site_U_iso_or_equiv 
 _atom_site_adp_type 
 _atom_site_occupancy 
 _atom_site_symmetry_multiplicity 
 _atom_site_calc_flag 
 _atom_site_refinement_flags 
 _atom_site_disorder_assembly 
 _atom_site_disorder_group 
O2 O 0.43212(14) 0.36478(9) 0.02226(8) 0.0288(3) Uani 1 1 d . . . 
H2 H 0.3659 0.3979 0.0359 0.043 Uiso 1 1 calc R . . 
O6 O 1.00646(15) 0.80601(10) -0.13660(8) 0.0312(3) Uani 1 1 d . . . 
O4 O 1.21773(14) 0.47685(9) 0.05425(8) 0.0282(3) Uani 1 1 d . . . 
O3 O 1.07201(14) 0.37758(9) 0.01843(8) 0.0251(3) Uani 1 1 d . . . 
O7 O 1.07761(19) 0.72307(10) 0.26323(9) 0.0362(4) Uani 1 1 d . . . 
C1 C 0.6793(2) 0.35854(12) 0.01059(11) 0.0236(4) Uani 1 1 d . . . 
H1 H 0.6698 0.3044 -0.0130 0.028 Uiso 1 1 calc R . . 
C2 C 0.83000(19) 0.47364(12) 0.05544(10) 0.0204(3) Uani 1 1 d . . . 
C3 C 0.99912(19) 0.54165(12) 0.14533(10) 0.0222(3) Uani 1 1 d . . . 
O8 O 1.00592(18) 0.42231(10) 0.31994(8) 0.0351(3) Uani 1 1 d . . . 
C4 C 0.81308(19) 0.39532(12) 0.01988(10) 0.0208(3) Uani 1 1 d . . . 
O1 O 0.72691(14) 0.59122(9) 0.11652(8) 0.0261(3) Uani 1 1 d . . . 
H1A H 0.6467 0.6151 0.1226 0.039 Uiso 1 1 calc R . . 
C5 C 0.57427(19) 0.47882(12) 0.07342(10) 0.0219(3) Uani 1 1 d . . . 
H5 H 0.4912 0.5068 0.0926 0.026 Uiso 1 1 calc R . . 
C6 C 0.97271(18) 0.51777(12) 0.06165(10) 0.0215(3) Uani 1 1 d . . . 
C7 C 0.9931(2) 0.73538(12) -0.09073(11) 0.0254(4) Uani 1 1 d . . . 
C8 C 1.09515(19) 0.45647(12) 0.04346(10) 0.0231(4) Uani 1 1 d . . . 
C9 C 1.1045(2) 0.64511(13) 0.00133(11) 0.0258(4) Uani 1 1 d . . . 
H9 H 1.1866 0.6318 0.0311 0.031 Uiso 1 1 calc R . . 
C10 C 0.5605(2) 0.40132(12) 0.03587(11) 0.0229(4) Uani 1 1 d . . . 
C11 C 0.8703(2) 0.61537(12) -0.03958(10) 0.0238(4) Uani 1 1 d . . . 
H11 H 0.7864 0.5806 -0.0388 0.029 Uiso 1 1 calc R . . 
C12 C 0.9451(2) 0.33644(13) -0.09456(11) 0.0291(4) Uani 1 1 d . . . 
H12A H 1.0246 0.2965 -0.1066 0.035 Uiso 1 1 calc R . . 
H12B H 0.8544 0.3099 -0.1123 0.035 Uiso 1 1 calc R . . 
C13 C 0.9685(2) 0.41743(14) -0.13819(11) 0.0282(4) Uani 1 1 d . . . 
C14 C 0.8731(2) 0.68512(13) -0.08764(11) 0.0254(4) Uani 1 1 d . . . 
H14 H 0.7919 0.6978 -0.1182 0.031 Uiso 1 1 calc R . . 
C15 C 1.1097(2) 0.71500(13) -0.04641(11) 0.0274(4) Uani 1 1 d . . . 
H15 H 1.1943 0.7491 -0.0485 0.033 Uiso 1 1 calc R . . 
C16 C 1.0390(2) 0.57504(14) 0.29900(11) 0.0282(4) Uani 1 1 d . . . 
H16 H 1.0509 0.5869 0.3511 0.034 Uiso 1 1 calc R . . 
O5 O 1.0323(2) 0.63975(13) -0.26297(10) 0.0483(5) Uani 1 1 d . . . 
C17 C 0.70746(19) 0.51477(12) 0.08270(10) 0.0212(3) Uani 1 1 d . . . 
C18 C 1.0243(2) 0.62419(12) 0.16979(10) 0.0247(4) Uani 1 1 d . . . 
H18 H 1.0263 0.6700 0.1348 0.030 Uiso 1 1 calc R . . 
C19 C 1.0134(2) 0.49218(13) 0.27372(11) 0.0264(4) Uani 1 1 d . . . 
C20 C 0.9368(2) 0.34591(12) -0.00885(11) 0.0246(4) Uani 1 1 d . . . 
H20 H 0.9262 0.2869 0.0119 0.029 Uiso 1 1 calc R . . 
C21 C 0.98324(19) 0.59422(12) 0.00692(10) 0.0221(3) Uani 1 1 d . . . 
C22 C 1.1007(2) 0.45653(14) -0.13922(11) 0.0282(4) Uani 1 1 d . . . 
H22 H 1.1773 0.4325 -0.1108 0.034 Uiso 1 1 calc R . . 
C23 C 0.8856(3) 0.52700(17) -0.22272(12) 0.0377(5) Uani 1 1 d . . . 
H23 H 0.8097 0.5504 -0.2521 0.045 Uiso 1 1 calc R . . 
C24 C 0.9951(2) 0.47565(13) 0.19778(11) 0.0253(4) Uani 1 1 d . . . 
H24 H 0.9798 0.4187 0.1813 0.030 Uiso 1 1 calc R . . 
C25 C 1.0467(2) 0.63955(13) 0.24586(11) 0.0272(4) Uani 1 1 d . . . 
C26 C 1.0182(3) 0.56618(16) -0.22203(12) 0.0353(5) Uani 1 1 d . . . 
C27 C 1.1260(2) 0.52985(14) -0.18039(11) 0.0311(4) Uani 1 1 d . . . 
H27 H 1.2191 0.5552 -0.1798 0.037 Uiso 1 1 calc R . . 
C28 C 0.8618(2) 0.45456(16) -0.18143(12) 0.0348(5) Uani 1 1 d . . . 
H28 H 0.7690 0.4290 -0.1826 0.042 Uiso 1 1 calc R . . 
C29 C 1.0062(3) 0.43679(17) 0.39929(12) 0.0398(5) Uani 1 1 d . . . 
H29A H 1.0992 0.4610 0.4144 0.060 Uiso 1 1 calc R . . 
H29B H 0.9908 0.3826 0.4256 0.060 Uiso 1 1 calc R . . 
H29C H 0.9288 0.4767 0.4123 0.060 Uiso 1 1 calc R . . 
C30 C 1.1176(4) 0.74057(17) 0.33830(14) 0.0499(7) Uani 1 1 d . . . 
H30A H 1.0335 0.7339 0.3712 0.075 Uiso 1 1 calc R . . 
H30B H 1.1536 0.7992 0.3419 0.075 Uiso 1 1 calc R . . 
H30C H 1.1934 0.7008 0.3540 0.075 Uiso 1 1 calc R . . 
C31 C 1.1702(3) 0.6770(2) -0.26380(19) 0.0651(9) Uani 1 1 d . . . 
H31A H 1.2044 0.6844 -0.2120 0.098 Uiso 1 1 calc R . . 
H31B H 1.1655 0.7327 -0.2887 0.098 Uiso 1 1 calc R . . 
H31C H 1.2370 0.6398 -0.2912 0.098 Uiso 1 1 calc R . . 
C32 C 0.8922(2) 0.82597(14) -0.18665(12) 0.0327(4) Uani 1 1 d . . . 
H32A H 0.8753 0.7776 -0.2205 0.049 Uiso 1 1 calc R . . 
H32B H 0.9178 0.8765 -0.2163 0.049 Uiso 1 1 calc R . . 
H32C H 0.8044 0.8376 -0.1577 0.049 Uiso 1 1 calc R . . 
 
loop_ 
 _atom_site_aniso_label 
 _atom_site_aniso_U_11 
 _atom_site_aniso_U_22 
 _atom_site_aniso_U_33 
 _atom_site_aniso_U_23 
 _atom_site_aniso_U_13 
 _atom_site_aniso_U_12 
O2 0.0167(6) 0.0270(7) 0.0427(8) -0.0063(6) 0.0003(6) -0.0031(5) 
O6 0.0260(7) 0.0309(7) 0.0367(8) 0.0119(6) -0.0079(6) -0.0086(6) 
O4 0.0188(6) 0.0317(7) 0.0341(7) -0.0032(6) -0.0020(5) 0.0006(5) 
O3 0.0188(6) 0.0253(6) 0.0311(7) -0.0041(5) -0.0022(5) 0.0014(5) 
O7 0.0488(9) 0.0280(7) 0.0319(8) -0.0087(6) -0.0090(7) 0.0023(7) 
C1 0.0204(8) 0.0213(8) 0.0292(9) -0.0027(7) 0.0010(7) -0.0022(7) 
C2 0.0192(8) 0.0211(8) 0.0209(8) 0.0018(7) -0.0009(6) 0.0002(6) 
C3 0.0175(7) 0.0266(9) 0.0225(8) -0.0026(7) -0.0013(6) 0.0009(7) 
O8 0.0443(8) 0.0379(8) 0.0231(7) 0.0049(6) -0.0028(6) -0.0074(7) 
C4 0.0193(8) 0.0222(8) 0.0211(8) 0.0021(7) 0.0005(6) 0.0000(6) 
O1 0.0214(6) 0.0226(6) 0.0343(7) -0.0064(5) 0.0010(5) 0.0021(5) 
C5 0.0184(8) 0.0242(8) 0.0232(8) 0.0008(7) 0.0014(6) 0.0007(7) 
C6 0.0177(8) 0.0240(8) 0.0229(8) -0.0022(7) -0.0001(6) 0.0007(6) 
C7 0.0251(9) 0.0252(9) 0.0258(9) 0.0041(7) 0.0000(7) -0.0015(7) 
C8 0.0215(8) 0.0255(9) 0.0224(8) 0.0006(7) -0.0009(6) 0.0009(7) 
C9 0.0201(8) 0.0295(9) 0.0278(9) 0.0004(8) -0.0024(7) -0.0026(7) 
C10 0.0193(8) 0.0235(8) 0.0258(8) 0.0009(7) -0.0020(7) -0.0033(7) 
C11 0.0214(8) 0.0257(9) 0.0244(9) 0.0002(7) -0.0014(7) -0.0022(7) 
C12 0.0242(9) 0.0334(10) 0.0296(10) -0.0087(8) 0.0024(7) -0.0022(8) 
C13 0.0257(9) 0.0366(11) 0.0225(9) -0.0060(8) 0.0008(7) 0.0015(8) 
C14 0.0204(8) 0.0310(10) 0.0249(9) 0.0016(7) -0.0014(7) -0.0024(8) 
C15 0.0230(9) 0.0292(10) 0.0300(9) 0.0033(8) -0.0050(7) -0.0076(8) 
C16 0.0266(9) 0.0346(10) 0.0233(9) -0.0047(7) -0.0018(7) 0.0038(8) 
O5 0.0499(11) 0.0547(11) 0.0403(9) 0.0186(8) 0.0008(8) 0.0117(9) 
C17 0.0220(8) 0.0208(8) 0.0207(8) -0.0005(6) -0.0010(6) -0.0005(7) 
C18 0.0238(9) 0.0242(9) 0.0259(9) -0.0024(7) -0.0018(7) 0.0008(7) 
C19 0.0227(9) 0.0315(10) 0.0250(9) 0.0019(7) -0.0008(7) 0.0002(7) 
C20 0.0187(8) 0.0239(8) 0.0311(9) -0.0054(7) -0.0006(7) -0.0007(7) 
C21 0.0212(8) 0.0240(8) 0.0212(8) -0.0016(7) 0.0001(7) -0.0016(7) 
C22 0.0241(9) 0.0354(11) 0.0252(9) -0.0044(8) 0.0006(7) 0.0047(8) 
C23 0.0329(11) 0.0528(14) 0.0273(10) -0.0009(10) -0.0048(8) 0.0100(10) 
C24 0.0238(9) 0.0270(9) 0.0250(8) -0.0003(7) -0.0009(7) -0.0026(8) 
C25 0.0243(9) 0.0283(9) 0.0290(9) -0.0066(7) -0.0018(7) 0.0017(8) 
C26 0.0373(11) 0.0451(12) 0.0235(9) 0.0022(8) 0.0031(8) 0.0087(10) 
C27 0.0291(10) 0.0380(11) 0.0262(9) -0.0006(8) 0.0030(8) 0.0039(9) 
C28 0.0255(9) 0.0503(13) 0.0285(10) -0.0076(9) -0.0016(8) 0.0016(9) 
C29 0.0429(12) 0.0545(14) 0.0219(10) 0.0052(9) 0.0003(9) -0.0075(11) 
C30 0.0731(18) 0.0376(13) 0.0388(13) -0.0148(10) -0.0198(12) 0.0105(13) 
C31 0.0503(16) 0.073(2) 0.072(2) 0.0453(17) 0.0095(14) 0.0059(15) 
C32 0.0277(10) 0.0376(11) 0.0327(10) 0.0106(9) -0.0044(8) -0.0017(8) 
 
_geom_special_details 
; 
 All esds (except the esd in the dihedral angle between two l.s. planes) 
 are estimated using the full covariance matrix.  The cell esds are taken 
 into account individually in the estimation of esds in distances, angles 
 and torsion angles; correlations between esds in cell parameters are only 
 used when they are defined by crystal symmetry.  An approximate (isotropic) 
 treatment of cell esds is used for estimating esds involving l.s. planes. 
; 
 
loop_ 
 _geom_bond_atom_site_label_1 
 _geom_bond_atom_site_label_2 
 _geom_bond_distance 
 _geom_bond_site_symmetry_2 
 _geom_bond_publ_flag 
O2 C10 1.343(2) . ? 
O2 H2 0.8400 . ? 
O6 C7 1.380(2) . ? 
O6 C32 1.419(2) . ? 
O4 C8 1.196(2) . ? 
O3 C8 1.331(2) . ? 
O3 C20 1.433(2) . ? 
O7 C25 1.375(3) . ? 
O7 C30 1.412(3) . ? 
C1 C10 1.366(3) . ? 
C1 C4 1.378(3) . ? 
C1 H1 0.9500 . ? 
C2 C4 1.389(3) . ? 
C2 C17 1.394(2) . ? 
C2 C6 1.497(2) . ? 
C3 C18 1.384(3) . ? 
C3 C24 1.393(3) . ? 
C3 C6 1.553(2) . ? 
O8 C19 1.370(2) . ? 
O8 C29 1.428(2) . ? 
C4 C20 1.476(2) . ? 
O1 C17 1.353(2) . ? 
O1 H1A 0.8400 . ? 
C5 C17 1.368(3) . ? 
C5 C10 1.392(3) . ? 
C5 H5 0.9500 . ? 
C6 C8 1.522(3) . ? 
C6 C21 1.546(3) . ? 
C7 C14 1.364(3) . ? 
C7 C15 1.376(3) . ? 
C9 C21 1.382(3) . ? 
C9 C15 1.386(3) . ? 
C9 H9 0.9500 . ? 
C11 C21 1.375(3) . ? 
C11 C14 1.387(3) . ? 
C11 H11 0.9500 . ? 
C12 C13 1.503(3) . ? 
C12 C20 1.532(3) . ? 
C12 H12A 0.9900 . ? 
C12 H12B 0.9900 . ? 
C13 C22 1.371(3) . ? 
C13 C28 1.381(3) . ? 
C14 H14 0.9500 . ? 
C15 H15 0.9500 . ? 
C16 C25 1.385(3) . ? 
C16 C19 1.395(3) . ? 
C16 H16 0.9500 . ? 
O5 C26 1.370(3) . ? 
O5 C31 1.406(4) . ? 
C18 C25 1.389(3) . ? 
C18 H18 0.9500 . ? 
C19 C24 1.385(3) . ? 
C20 H20 1.0000 . ? 
C22 C27 1.382(3) . ? 
C22 H22 0.9500 . ? 
C23 C28 1.370(3) . ? 
C23 C26 1.375(3) . ? 
C23 H23 0.9500 . ? 
C24 H24 0.9500 . ? 
C26 C27 1.368(3) . ? 
C27 H27 0.9500 . ? 
C28 H28 0.9500 . ? 
C29 H29A 0.9800 . ? 
C29 H29B 0.9800 . ? 
C29 H29C 0.9800 . ? 
C30 H30A 0.9800 . ? 
C30 H30B 0.9800 . ? 
C30 H30C 0.9800 . ? 
C31 H31A 0.9800 . ? 
C31 H31B 0.9800 . ? 
C31 H31C 0.9800 . ? 
C32 H32A 0.9800 . ? 
C32 H32B 0.9800 . ? 
C32 H32C 0.9800 . ? 
 
loop_ 
 _geom_angle_atom_site_label_1 
 _geom_angle_atom_site_label_2 
 _geom_angle_atom_site_label_3 
 _geom_angle 
 _geom_angle_site_symmetry_1 
 _geom_angle_site_symmetry_3 
 _geom_angle_publ_flag 
C10 O2 H2 109.5 . . ? 
C7 O6 C32 118.67(16) . . ? 
C8 O3 C20 125.15(14) . . ? 
C25 O7 C30 116.87(18) . . ? 
C10 C1 C4 118.80(17) . . ? 
C10 C1 H1 120.6 . . ? 
C4 C1 H1 120.6 . . ? 
C4 C2 C17 118.33(16) . . ? 
C4 C2 C6 122.77(16) . . ? 
C17 C2 C6 118.80(16) . . ? 
C18 C3 C24 119.22(17) . . ? 
C18 C3 C6 123.53(17) . . ? 
C24 C3 C6 117.24(16) . . ? 
C19 O8 C29 117.69(17) . . ? 
C1 C4 C2 121.71(17) . . ? 
C1 C4 C20 116.07(16) . . ? 
C2 C4 C20 122.21(16) . . ? 
C17 O1 H1A 109.5 . . ? 
C17 C5 C10 120.01(17) . . ? 
C17 C5 H5 120.0 . . ? 
C10 C5 H5 120.0 . . ? 
C2 C6 C8 110.63(15) . . ? 
C2 C6 C21 111.55(14) . . ? 
C8 C6 C21 107.95(14) . . ? 
C2 C6 C3 108.74(14) . . ? 
C8 C6 C3 103.75(14) . . ? 
C21 C6 C3 113.94(15) . . ? 
C14 C7 C15 118.96(17) . . ? 
C14 C7 O6 124.07(18) . . ? 
C15 C7 O6 116.97(17) . . ? 
O4 C8 O3 117.04(17) . . ? 
O4 C8 C6 120.44(17) . . ? 
O3 C8 C6 122.46(16) . . ? 
C21 C9 C15 121.86(17) . . ? 
C21 C9 H9 119.1 . . ? 
C15 C9 H9 119.1 . . ? 
O2 C10 C1 116.52(16) . . ? 
O2 C10 C5 122.67(17) . . ? 
C1 C10 C5 120.80(17) . . ? 
C21 C11 C14 123.08(17) . . ? 
C21 C11 H11 118.5 . . ? 
C14 C11 H11 118.5 . . ? 
C13 C12 C20 115.99(16) . . ? 
C13 C12 H12A 108.3 . . ? 
C20 C12 H12A 108.3 . . ? 
C13 C12 H12B 108.3 . . ? 
C20 C12 H12B 108.3 . . ? 
H12A C12 H12B 107.4 . . ? 
C22 C13 C28 116.4(2) . . ? 
C22 C13 C12 120.90(18) . . ? 
C28 C13 C12 122.62(19) . . ? 
C7 C14 C11 119.67(17) . . ? 
C7 C14 H14 120.2 . . ? 
C11 C14 H14 120.2 . . ? 
C7 C15 C9 120.44(17) . . ? 
C7 C15 H15 119.8 . . ? 
C9 C15 H15 119.8 . . ? 
C25 C16 C19 117.95(18) . . ? 
C25 C16 H16 121.0 . . ? 
C19 C16 H16 121.0 . . ? 
C26 O5 C31 116.23(19) . . ? 
O1 C17 C5 122.61(17) . . ? 
O1 C17 C2 117.09(16) . . ? 
C5 C17 C2 120.29(17) . . ? 
C3 C18 C25 119.53(18) . . ? 
C3 C18 H18 120.2 . . ? 
C25 C18 H18 120.2 . . ? 
O8 C19 C24 115.38(18) . . ? 
O8 C19 C16 124.01(17) . . ? 
C24 C19 C16 120.60(18) . . ? 
O3 C20 C4 112.44(15) . . ? 
O3 C20 C12 109.02(15) . . ? 
C4 C20 C12 115.71(16) . . ? 
O3 C20 H20 106.3 . . ? 
C4 C20 H20 106.3 . . ? 
C12 C20 H20 106.3 . . ? 
C11 C21 C9 115.95(17) . . ? 
C11 C21 C6 121.12(16) . . ? 
C9 C21 C6 122.92(16) . . ? 
C13 C22 C27 122.05(19) . . ? 
C13 C22 H22 119.0 . . ? 
C27 C22 H22 119.0 . . ? 
C28 C23 C26 120.6(2) . . ? 
C28 C23 H23 119.7 . . ? 
C26 C23 H23 119.7 . . ? 
C19 C24 C3 120.67(19) . . ? 
C19 C24 H24 119.7 . . ? 
C3 C24 H24 119.7 . . ? 
O7 C25 C16 123.53(18) . . ? 
O7 C25 C18 114.50(18) . . ? 
C16 C25 C18 121.97(19) . . ? 
C27 C26 O5 124.6(2) . . ? 
C27 C26 C23 118.2(2) . . ? 
O5 C26 C23 117.2(2) . . ? 
C26 C27 C22 120.5(2) . . ? 
C26 C27 H27 119.7 . . ? 
C22 C27 H27 119.7 . . ? 
C23 C28 C13 122.1(2) . . ? 
C23 C28 H28 118.9 . . ? 
C13 C28 H28 118.9 . . ? 
O8 C29 H29A 109.5 . . ? 
O8 C29 H29B 109.5 . . ? 
H29A C29 H29B 109.5 . . ? 
O8 C29 H29C 109.5 . . ? 
H29A C29 H29C 109.5 . . ? 
H29B C29 H29C 109.5 . . ? 
O7 C30 H30A 109.5 . . ? 
O7 C30 H30B 109.5 . . ? 
H30A C30 H30B 109.5 . . ? 
O7 C30 H30C 109.5 . . ? 
H30A C30 H30C 109.5 . . ? 
H30B C30 H30C 109.5 . . ? 
O5 C31 H31A 109.5 . . ? 
O5 C31 H31B 109.5 . . ? 
H31A C31 H31B 109.5 . . ? 
O5 C31 H31C 109.5 . . ? 
H31A C31 H31C 109.5 . . ? 
H31B C31 H31C 109.5 . . ? 
O6 C32 H32A 109.5 . . ? 
O6 C32 H32B 109.5 . . ? 
H32A C32 H32B 109.5 . . ? 
O6 C32 H32C 109.5 . . ? 
H32A C32 H32C 109.5 . . ? 
H32B C32 H32C 109.5 . . ? 
 
_diffrn_measured_fraction_theta_max    0.994 
_diffrn_reflns_theta_full              28.28 
_diffrn_measured_fraction_theta_full   0.994 
_refine_diff_density_max    0.199 
_refine_diff_density_min   -0.250 
_refine_diff_density_rms    0.058 
